# Supplementary material for: Synthesis of rare-earth metal and rare-earth metal-fluoride nanoparticles in ionic liquids and propylene carbonate
Source: PubMed Central journal article supplement (PMC6036975; doi:10.3762/bjnano.9.180), 2018-06-28
Supplement: Beilstein_J_Nanotechnol-09-1881-s001.pdf [file Beilstein_J_Nanotechnol-09-1881-s001.pdf]

# Supporting Information

for

## **Synthesis of rare-earth metal and rare-earth metal-fluoride nanoparticles in ionic liquids and propylene carbonate**

Marvin Siebels<sup>1</sup>, Lukas Mai<sup>2</sup>, Laura Schmolke<sup>1</sup>, Kai Schütte<sup>1</sup>, Juri Barthel<sup>3</sup>, Junpei Yue<sup>4</sup>, Jörg Thomas<sup>5</sup>, Bernd M. Smarsly<sup>4</sup>, Anjana Devi<sup>2</sup>, Roland A. Fischer<sup>6</sup> and Christoph Janiak\*<sup>1</sup>

Address: <sup>1</sup>Institut für Anorganische Chemie und Strukturchemie, Heinrich-Heine-Universität Düsseldorf, 40204 Düsseldorf, Germany. Fax: +49-211-81-12287; Tel: +49-211-81-12286; <sup>2</sup>Inorganic Materials Chemistry, Ruhr-Universität Bochum, 44801 Bochum, Germany; <sup>3</sup>Gemeinschaftslabor für Elektronenmikroskopie RWTH-Aachen, Ernst Ruska-Centrum für Mikroskopie und Spektroskopie mit Elektronen, 52425 Jülich, Germany; <sup>4</sup>Physikalisch-Chemisches Institut, Justus-Liebig-Universität Gießen, 35392 Gießen, Germany; <sup>5</sup>Department Structure and Nano-/Micromechanics of Materials, Max-Planck-Institut für Eisenforschung GmbH, 40237 Düsseldorf, Germany and <sup>6</sup>Department of Chemistry, Technische Universität München, 85748 Garching, Germany

Email: Christoph Janiak\* - [janiak@uni-duesseldorf.de](mailto:janiak@uni-duesseldorf.de)

\* Corresponding author

## **Additional experimental data**

## Content

Thermogravimetric analysis, TGA of rare earth amidinates and  $\text{Eu}(\text{dpm})_3$

Structural formulas of the ionic liquids (ILs) and propylene carbonate (PC)

TEM images, particle size histogram, PXRD, SAED, EDX and XPS of  $\text{RE}_3\text{-NPs}$

TEM images, particle size histogram, SAED, EDX and XPS of Er-NPs in [BMIm][NTf<sub>2</sub>]

TEM images, particle size histogram, SAED, EDX and XPS of RE-NPs in PC

## Thermogravimetric analysis, TGA of rare earth amidinates and $\text{Eu}(\text{dpm})_3$

**Table S1:** Thermogravimetric analysis of the rare earth metal amidinates and  $\text{Eu}(\text{dpm})_3$ <sup>a</sup>.

| Precursor                 | Decomposition temperature [°C] | $\Delta m_{\text{TGA}}$ (exptl/calcd) |
|---------------------------|--------------------------------|---------------------------------------|
| $\text{Pr}(\text{amd})_3$ | 160                            | 66/70                                 |
| $\text{Eu}(\text{dpm})_3$ | 220                            | 89/79                                 |
| $\text{Gd}(\text{amd})_3$ | 230                            | 90/74                                 |
| $\text{Er}(\text{amd})_3$ | 220                            | 82/72                                 |

<sup>a</sup> See thermogravimetric diagrams in Figure S2.

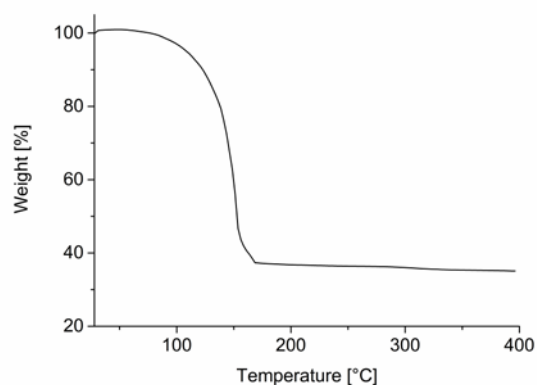

**Figure S2a:** TGA  $\text{Pr}(\text{amd})_3$ , 25–400 °C, 5 K/min.

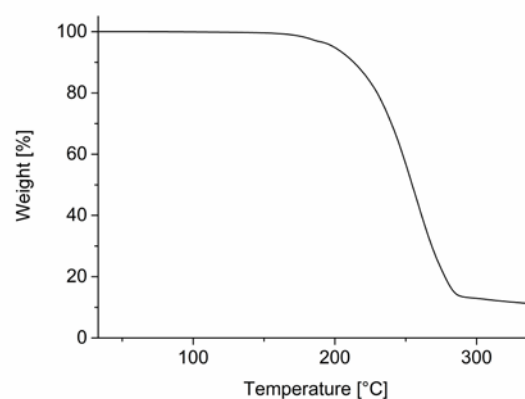

**Figure S2b:** TGA  $\text{Eu}(\text{dpm})_3$ , 25–350 °C, 5 K/min.

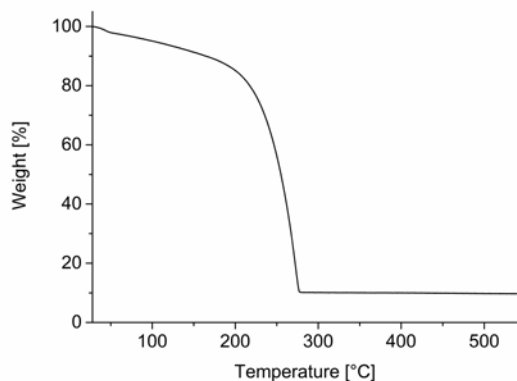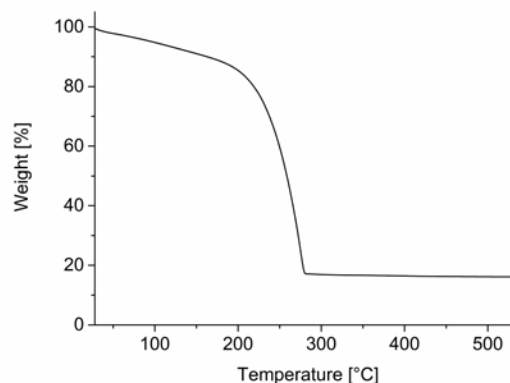

**Figure S2c:** TGA  $\text{Gd(amd)}_3$ , 25–550 °C, **Figure S2d:** TGA  $\text{Er(amd)}_3$ , 25–550 °C, 5 K/min.

### Structural formulas of the ionic liquids (ILs) and propylene carbonate (PC)

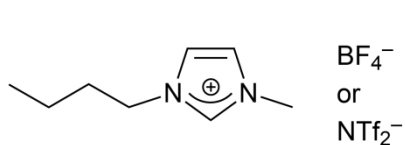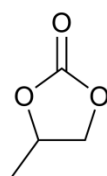

1-*n*-butyl-3-methyl-imidazolium  
- tetrafluoroborate  $[\text{BMIm}][\text{BF}_4]$   
- bistriflimide  $[\text{BMIm}][\text{NTf}_2]$ ,  $\text{NTf}_2^- = [(\text{CF}_3\text{SO}_2)_2\text{N}]^-$

propylene  
carbonate, PC

**Figure S3:** Ionic liquids (ILs) and propylene carbonate (PC) used as reaction media and stabilizer for NP syntheses.

## TEM images, particle size histogram, PXRD, SAED, EDX and XPS of $\text{PrF}_3$ -NPs

$\text{PrF}_3$ -NPs in  $[\text{BMIm}][\text{BF}_4]$

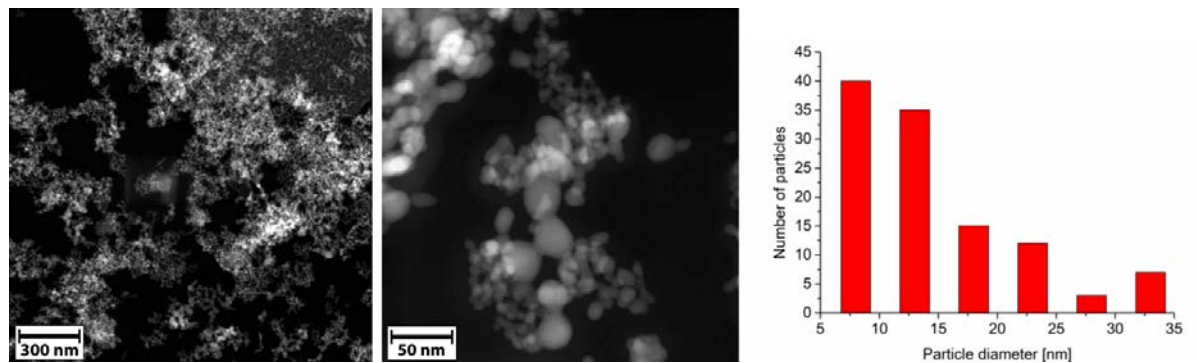

**Figure S4a:** HAADF-STEM images and particle size histogram of 1.0 wt %  $\text{PrF}_3$ -NPs in  $[\text{BMIm}][\text{BF}_4]$  from  $\text{Pr}(\text{amd})_3$ .

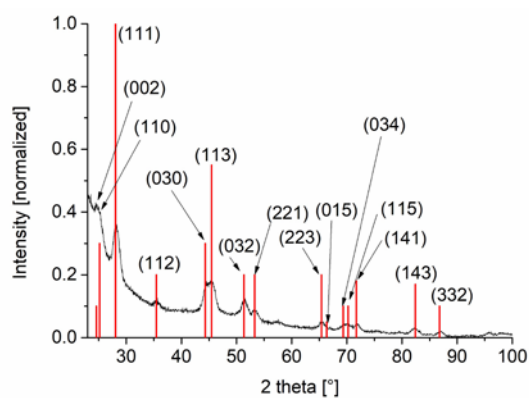

**Figure S4b:** PXRD ( $\text{PrF}_3$  reference peaks in red from COD 1010984, hexagonal with space group  $P6_3/mcm$ ) of 1.0 wt %  $\text{PrF}_3$ -NPs in  $[\text{BMIm}][\text{BF}_4]$  from  $\text{Pr}(\text{amd})_3$ .

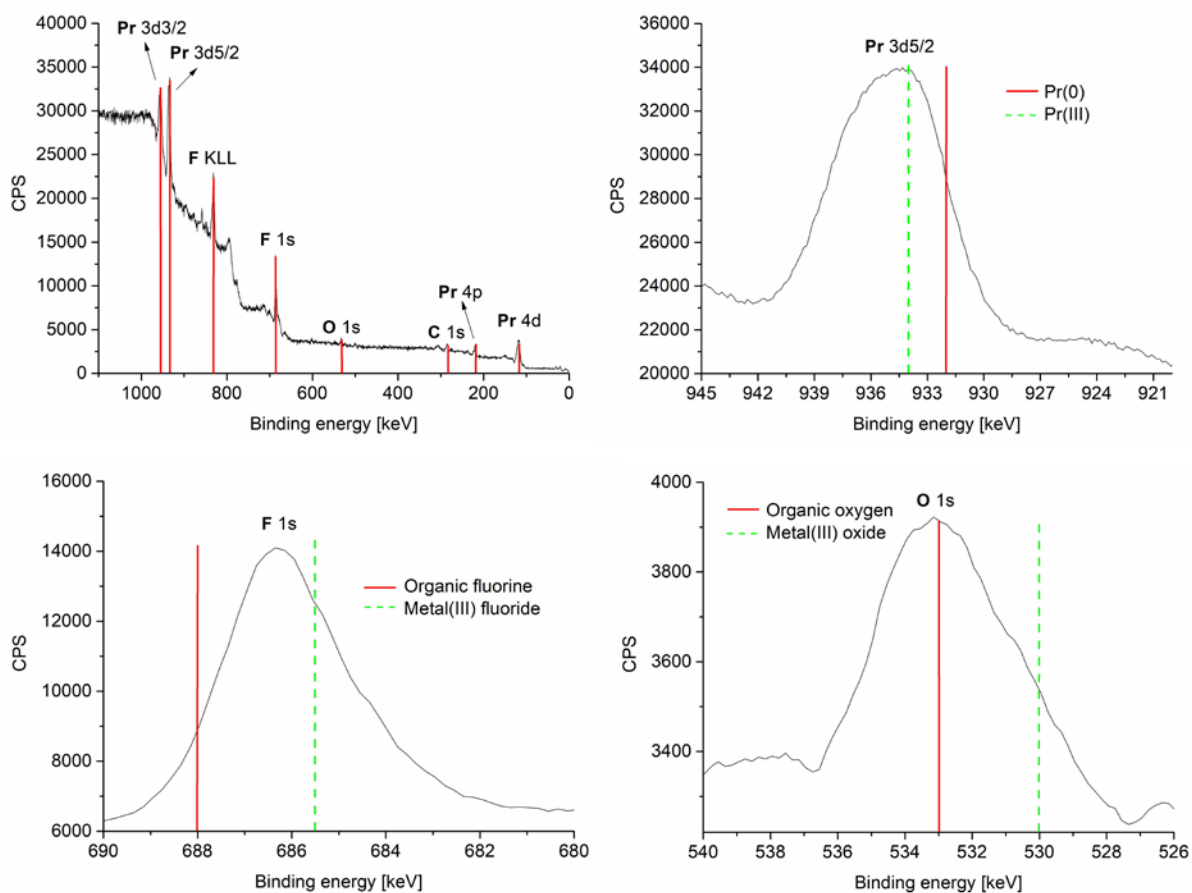

**Figure S4c:** Overview and HR-XPS of 1.0 wt %  $\text{PrF}_3$ -NPs in  $[\text{BMIm}][\text{BF}_4]$  from  $\text{Pr}(\text{amd})_3$ . The red and green bars are a guide to the eye on the binding-energy axis.

#### *$\text{EuF}_3$ -NPs in $[\text{BMIm}][\text{BF}_4]$*

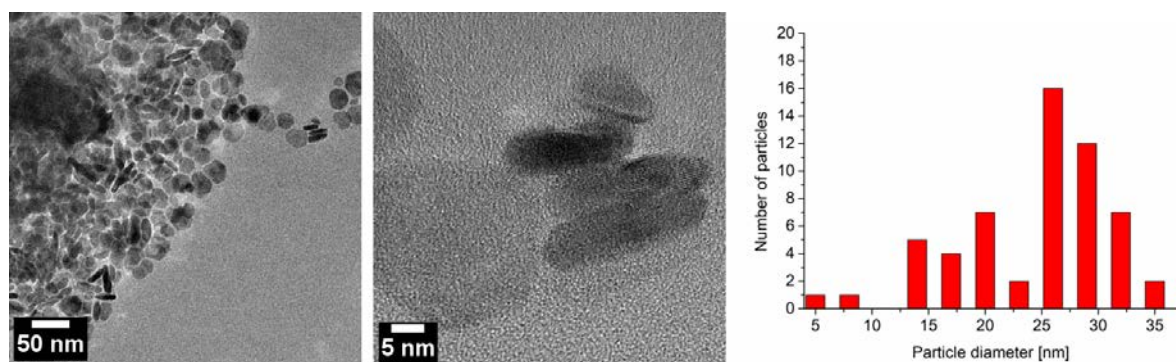

**Figure S5a:** TEM images and particle size histogram of 1.0 wt %  $\text{EuF}_3$ -NPs in  $[\text{BMIm}][\text{BF}_4]$  from  $\text{Eu}(\text{dpm})_3$ .

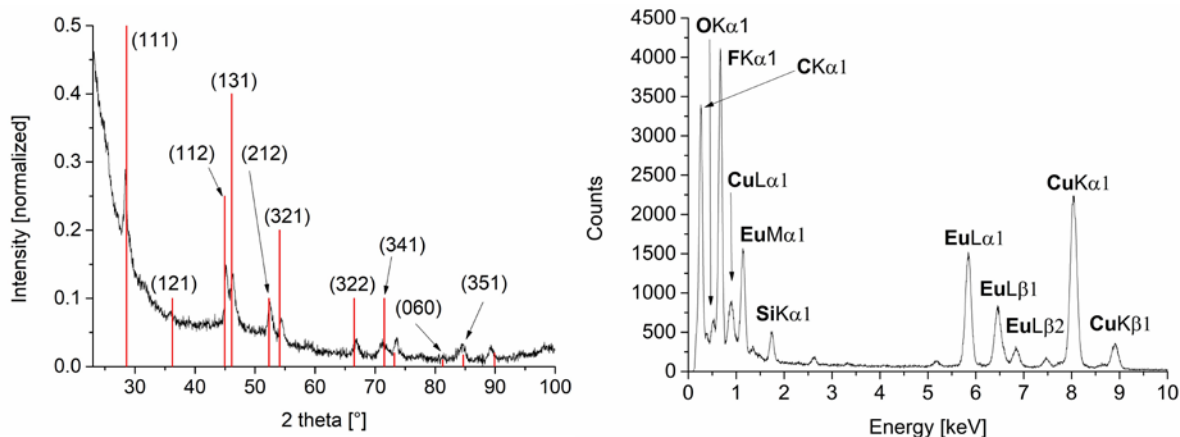

**Figure S5b:** PXRD ( $\text{EuF}_3$  reference peaks in red from COD 1532444, orthorhombic with space group  $Pnma$ ) and EDX of 1.0 wt %  $\text{EuF}_3$ -NPs in  $[\text{BMIm}][\text{BF}_4]$  from  $\text{Eu}(\text{dpm})_3$ .

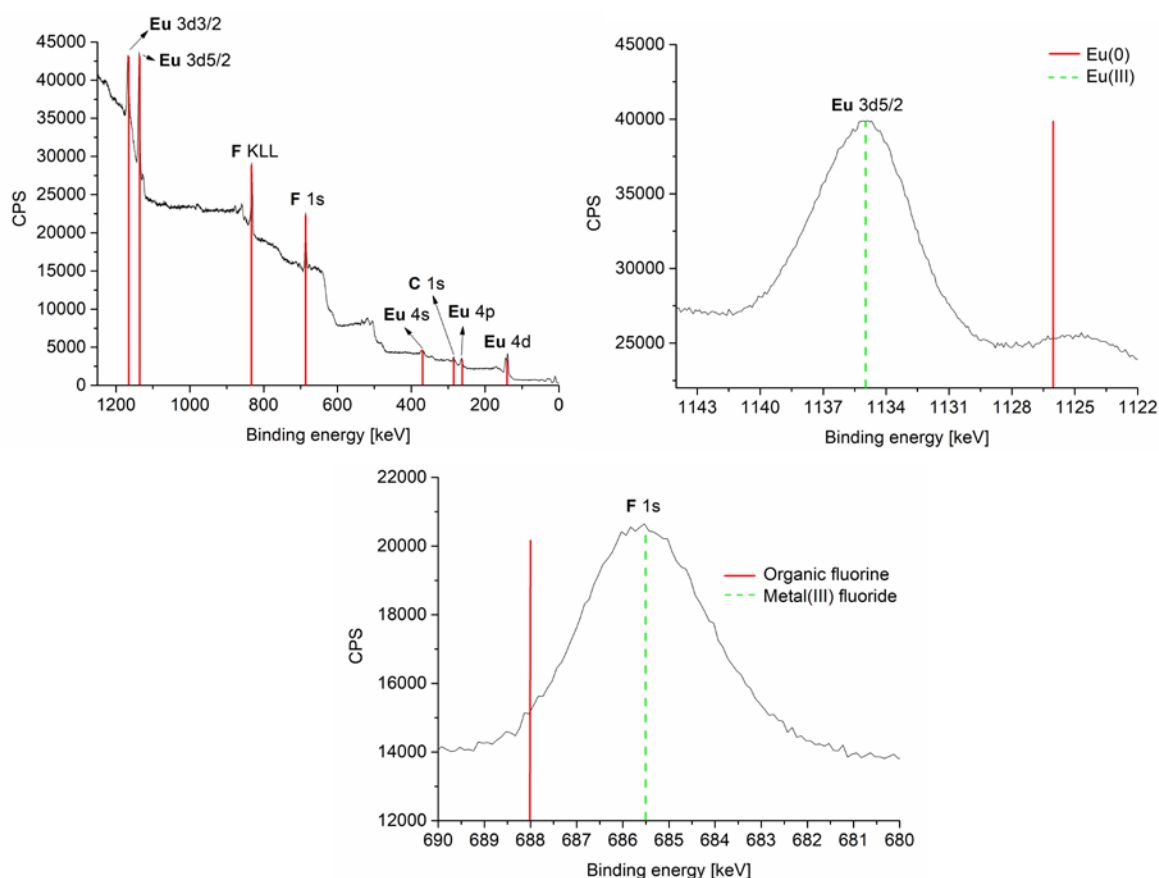

**Figure S5c:** Overview and HR-XPS of 1.0 wt %  $\text{EuF}_3$ -NPs in  $[\text{BMIm}][\text{BF}_4]$  from  $\text{Eu}(\text{dpm})_3$ . The red and green bars are a guide to the eye on the binding-energy axis.

### GdF<sub>3</sub>-NPs in [BMIm][BF<sub>4</sub>]

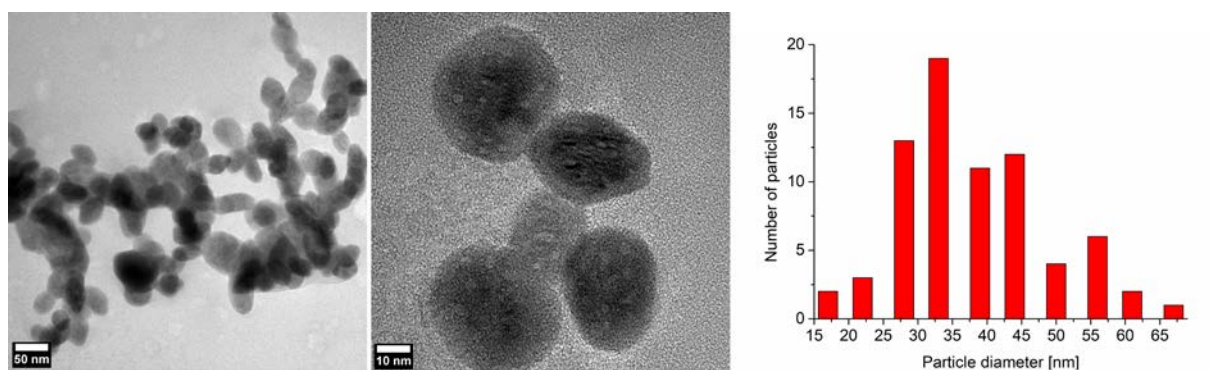

**Figure S6a:** TEM images and particle size histogram of 1.0 wt % GdF<sub>3</sub>-NPs in [BMIm][BF<sub>4</sub>] from Gd(amd)<sub>3</sub>.

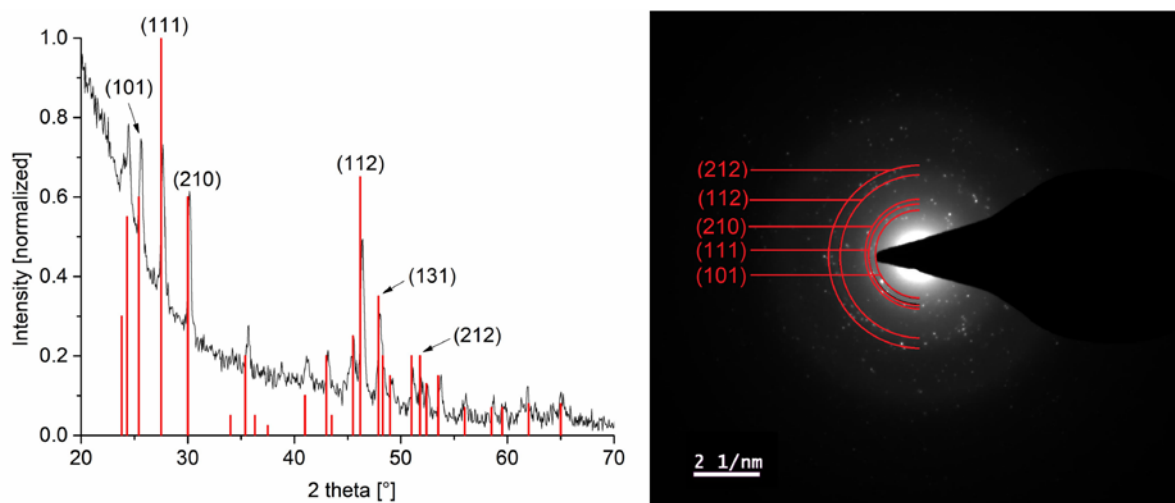

**Figure S6b:** PXRD and SAED (GdF<sub>3</sub> reference peaks in red from ICDD 0120788, orthorhombic with space group *Pnma*) of 1.0 wt % GdF<sub>3</sub>-NPs in [BMIm][BF<sub>4</sub>] from Gd(amd)<sub>3</sub>.

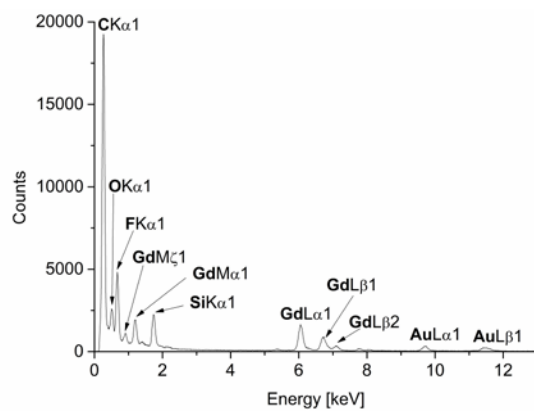

**Figure S6c:** EDX of 1.0 wt %  $GdF_3$ -NPs in [BMIm][ $BF_4$ ] from  $Gd(amd)_3$ .



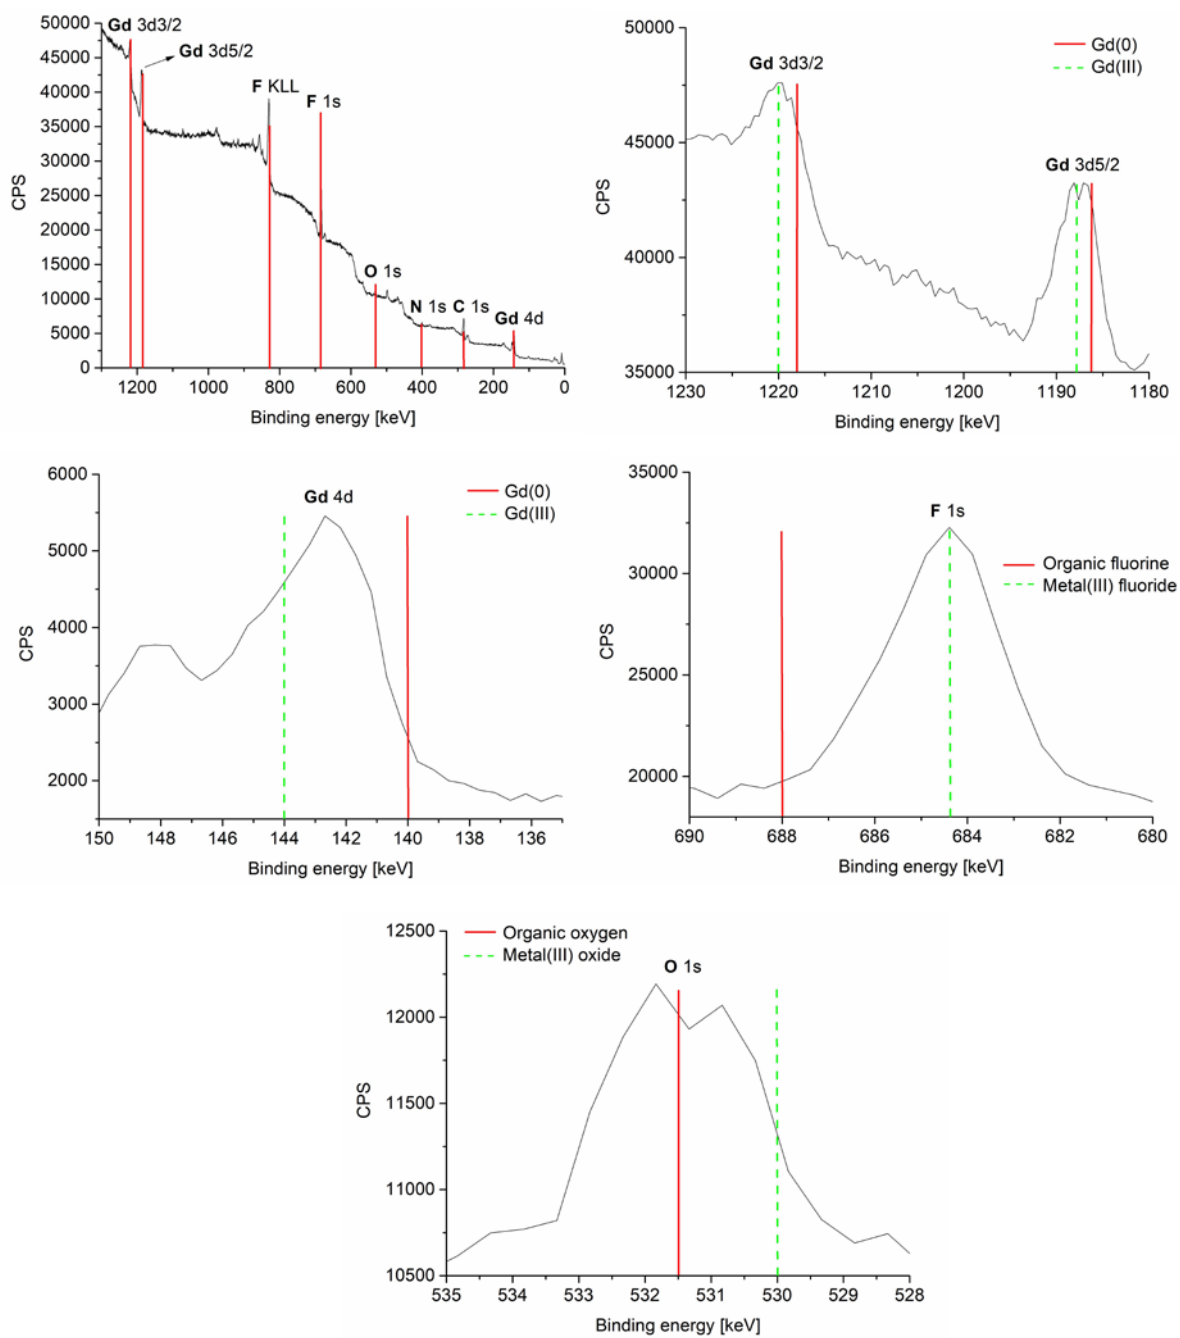

**Figure S6d:** Overview and HR-XPS of 1.0 wt %  $\text{GdF}_3$ -NPs in  $[\text{BMIm}][\text{BF}_4]$  from  $\text{Gd}(\text{amd})_3$ . The red and green bars are a guide to the eye on the binding-energy axis.

## TEM images, particle size histogram, SAED, EDX and XPS of Er-NPs in [BMIm][NTf<sub>2</sub>]

*Er-NPs in [BMIm][NTf<sub>2</sub>]*

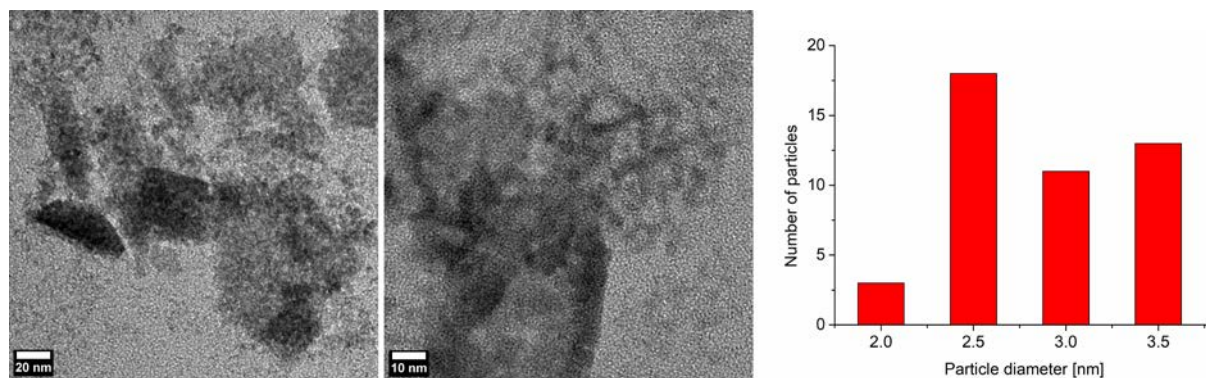

**Figure S7a:** TEM images and particle size histogram of 1.0 wt % Er-NPs in [BMIm][NTf<sub>2</sub>] from Er(amd)<sub>3</sub>.

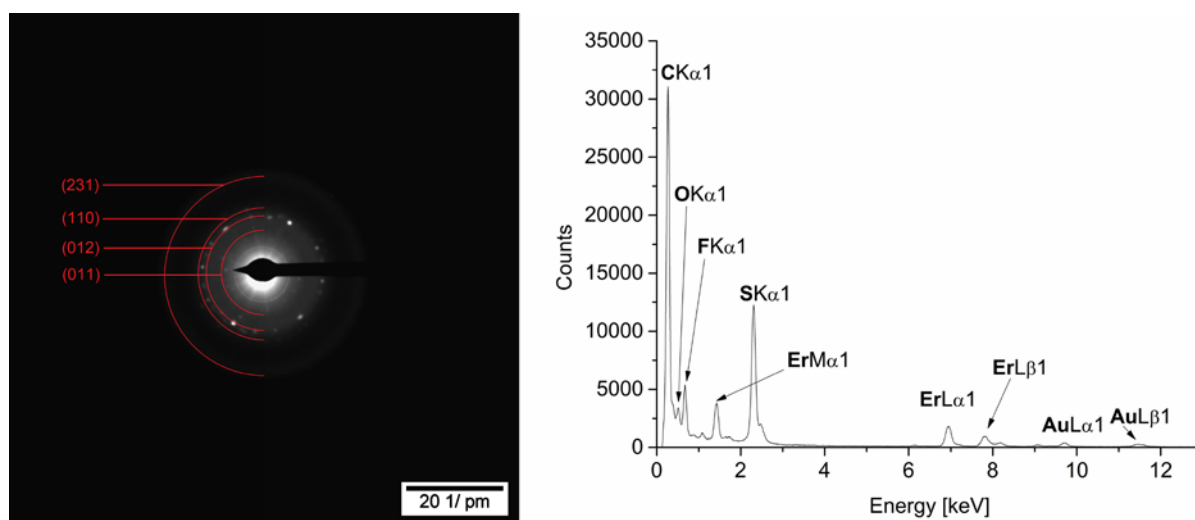

**Figure S7b:** SAED (Er reference peaks in red from COD 9008496, hexagonal with space group  $P6_3/mcm$ ) and EDX of 1.0 wt % Er-NPs in [BMIm][NTf<sub>2</sub>] from Er(amd)<sub>3</sub>.

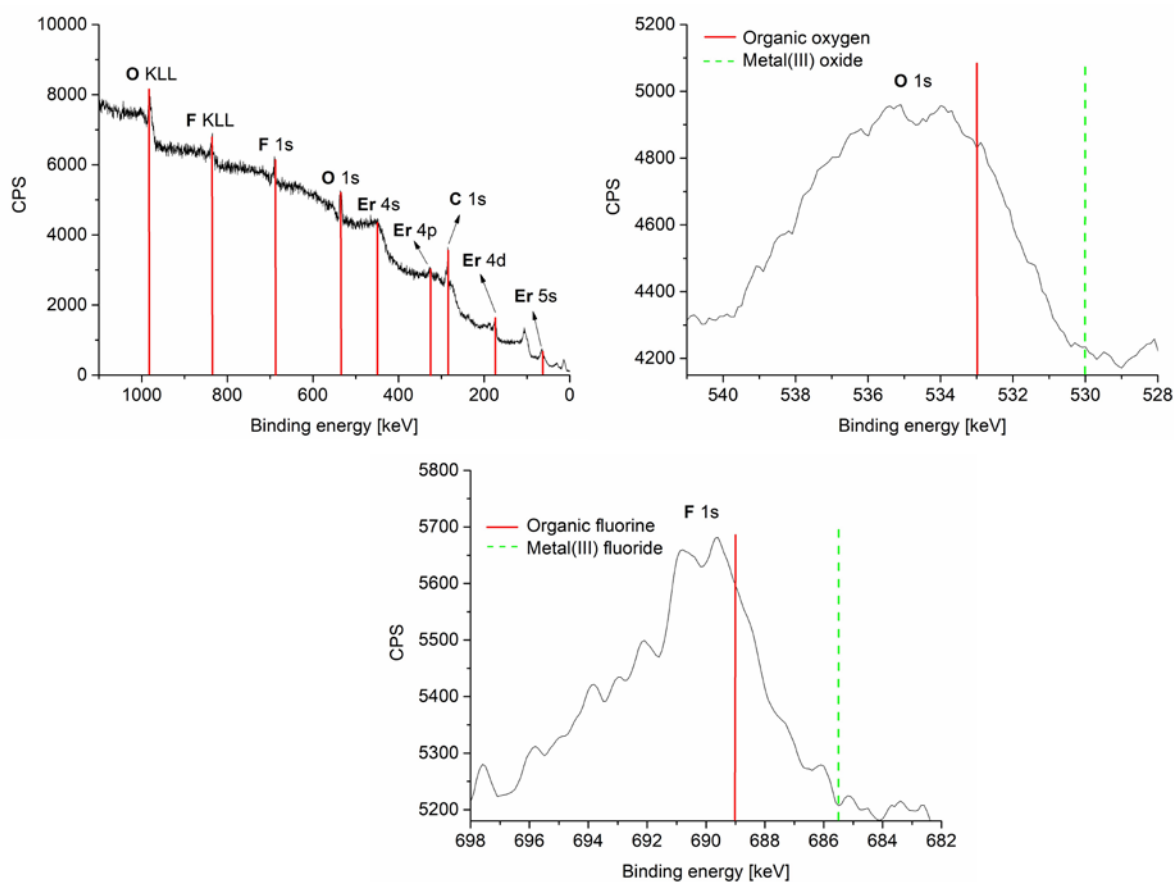

**Figure S7c:** Overview and HR-XPS of 1.0 wt % Er-NPs in [BMIm][NTf<sub>2</sub>] from Er(amd)<sub>3</sub>. The red and green bars are a guide to the eye on the binding-energy axis.

## TEM images, particle size histogram, SAED, EDX and XPS of RE-NPs in PC

### Pr-NPs in PC

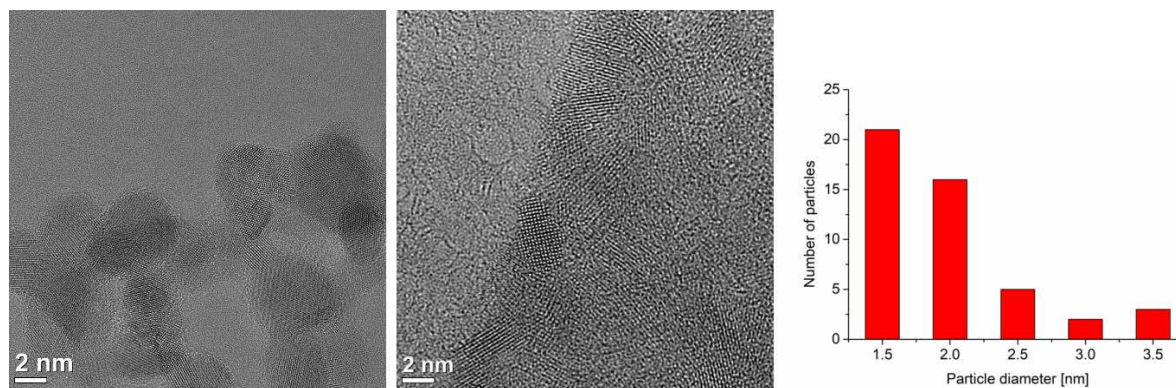

**Figure S8a:** TEM images and particle size histogram of 1.0 wt % Pr-NPs in PC from Pr(amd)<sub>3</sub>.

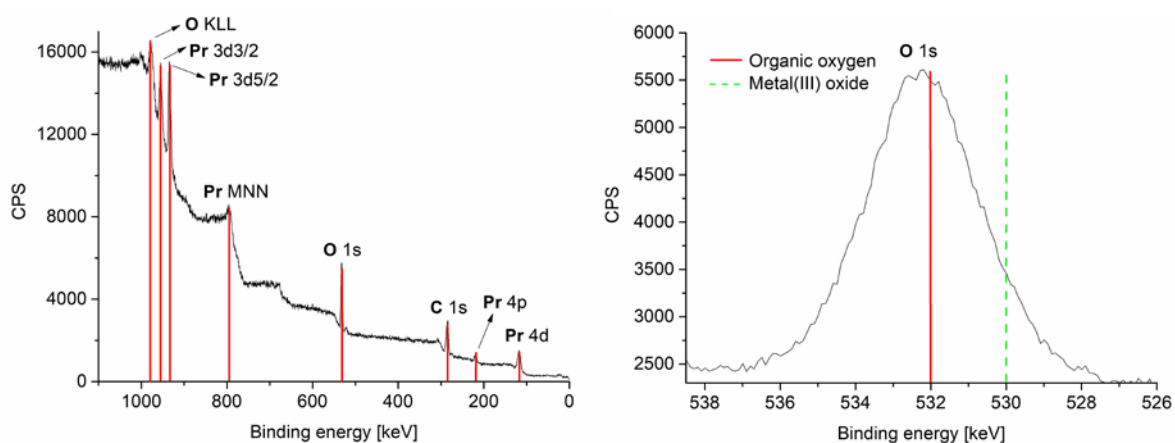

**Figure S8b:** Overview and HR-XPS of 1.0 wt % Pr-NPs in PC from Pr(amd)<sub>3</sub>. The red and green bars are a guide to the eye on the binding-energy axis.

### Er-NPs in PC

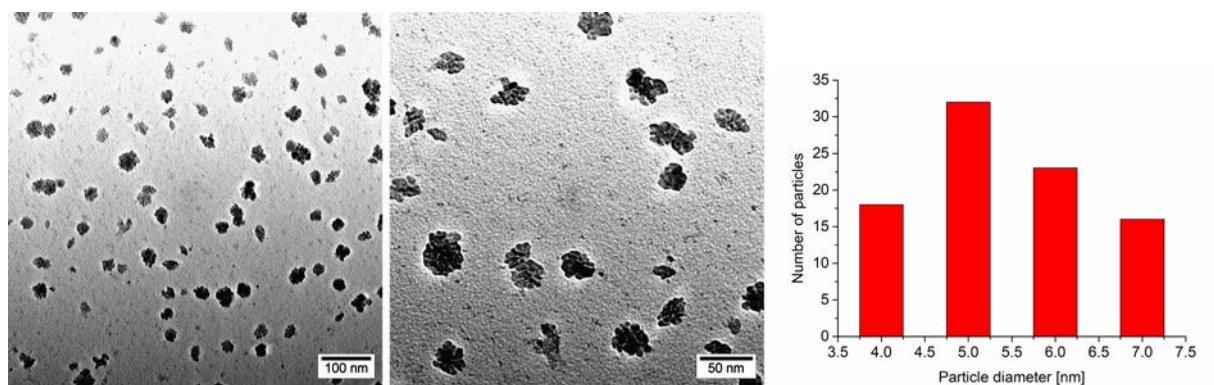

**Figure S9a:** TEM images and particle size histogram of 1.0 wt % Er-NPs in PC from  $\text{Er}(\text{amd})_3$ .

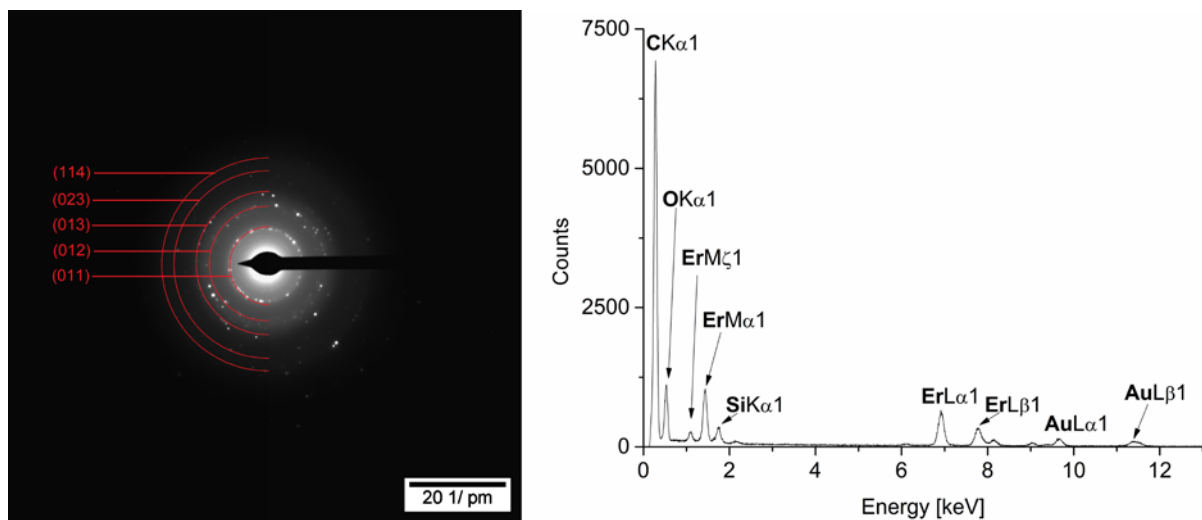

**Figure S9b:** SAED (Er reference peaks in red from COD 9008496, hexagonal with space group  $P6_3/mcm$ ) and EDX of 1.0 wt % Er-NPs in PC from  $\text{Er}(\text{amd})_3$ .

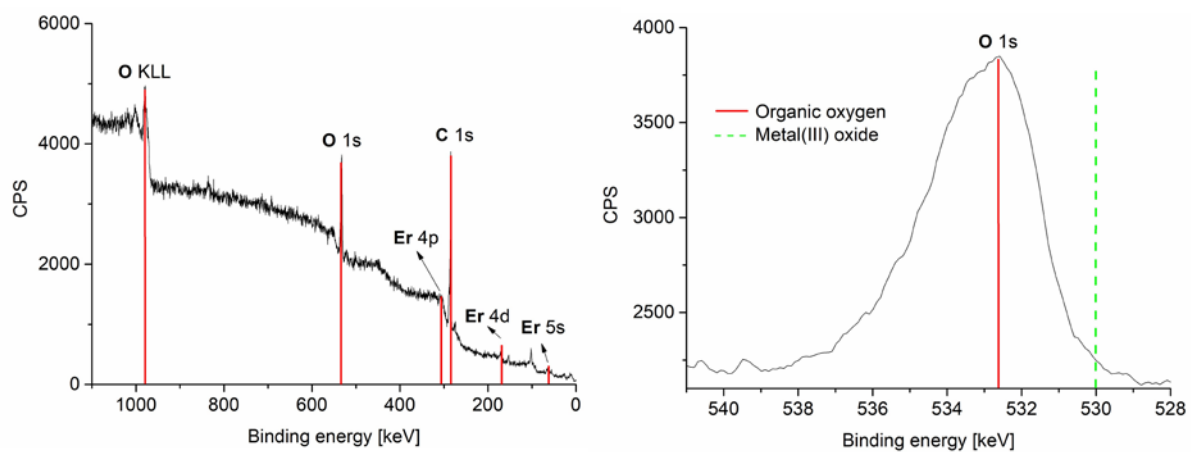

**Figure S9c:** Overview and HR-XPS of 1.0 wt % Er-NPs in PC from  $\text{Er}(\text{amd})_3$ . The red and green bars are a guide to the eye on the binding-energy axis.
